# Supplementary material for: Chirality sensing using Ag+–thiol coordination polymers
Source: Royal Society of Chemistry journal article supplement (doi:10.1039/c5cc01221j), 2015-01-01
Supplement: c5cc01221j1.pdf [file c5cc01221j1.pdf]

## **Chirality Sensing using Ag<sup>+</sup>-Thiol Coordination Polymers**

Qian Zhang, Yuan Hong, Na Chen, Dan-Dan Tao, Zhao Li, Yun-Bao Jiang\*

Department of Chemistry, College of Chemistry and Chemical Engineering, the MOE Key Laboratory of Spectrochemical Analysis and Instrumentation, and the Collaborative Innovation Center of Chemistry for Energy Materials (*iChEM*), Xiamen University, Xiamen 361005, China

E-mail: [ybjjiang@xmu.edu.cn](mailto:ybjjiang@xmu.edu.cn)

### **Electronic Supplementary Information (ESI)**

**Figures S1 – S6**

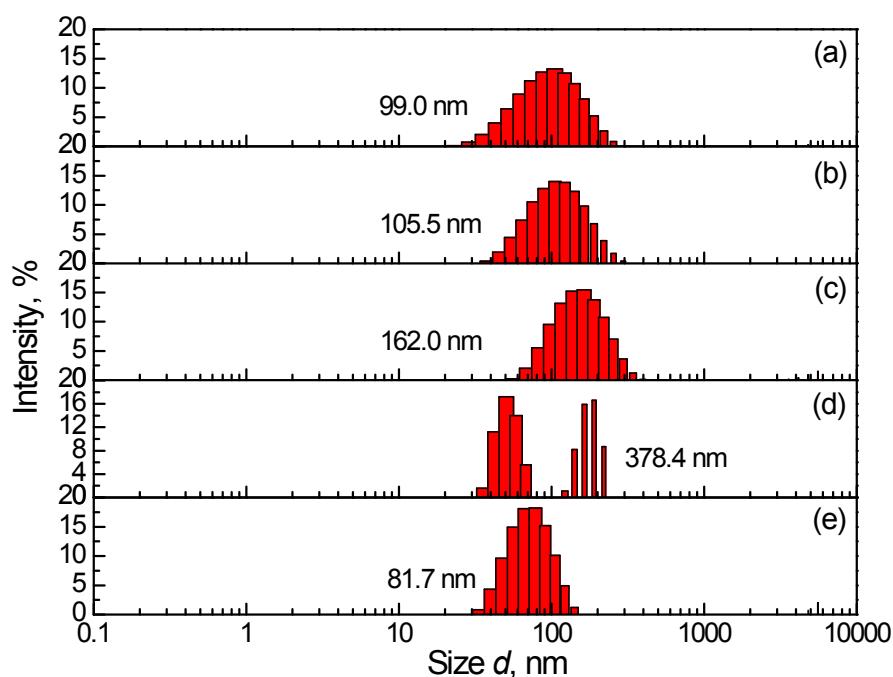

**Figure S1** Size of  $\text{Ag}^+$ -MPBA coordination polymers in the absence (a) and presence of D-glucose (b), D-mannose (c), D-fructose (d) and D-galactose (e) in pH 10.0 carbonate buffer containing 50% by volume methanol.  $[\text{MPBA}] = [\text{Ag}^+] = 0.1 \text{ mM}$ ,  $[\text{D-saccharide}] = 1.0 \text{ mM}$ .

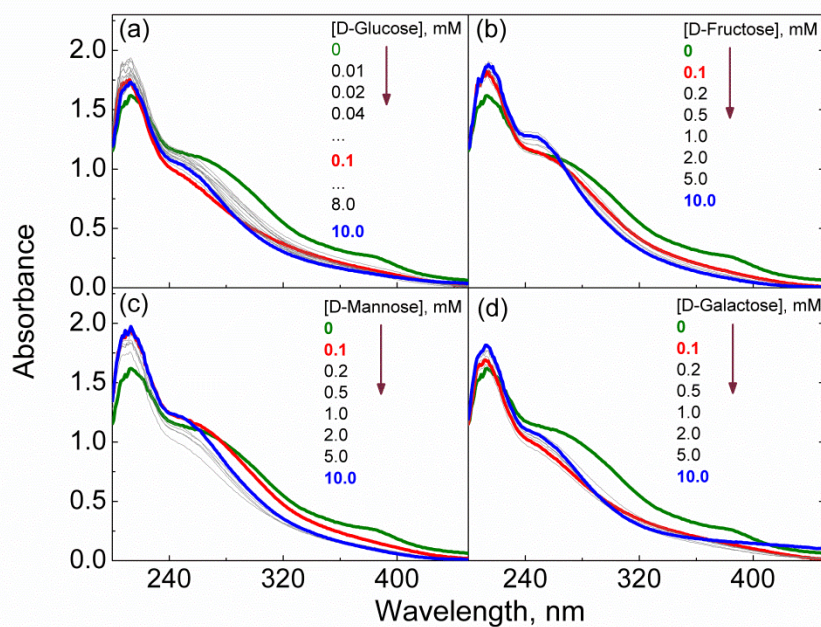

**Figure S2** Absorption spectra of  $\text{Ag}^+$ -MPBA coordination polymers in the presence of D-saccharides of increasing concentration in pH 10.0 carbonate buffer containing 50% (v/v) methanol.  $[\text{MPBA}] = [\text{Ag}^+] = 0.1 \text{ mM}$ .

**(a)  $\text{Ag}^+$  + MPBA**

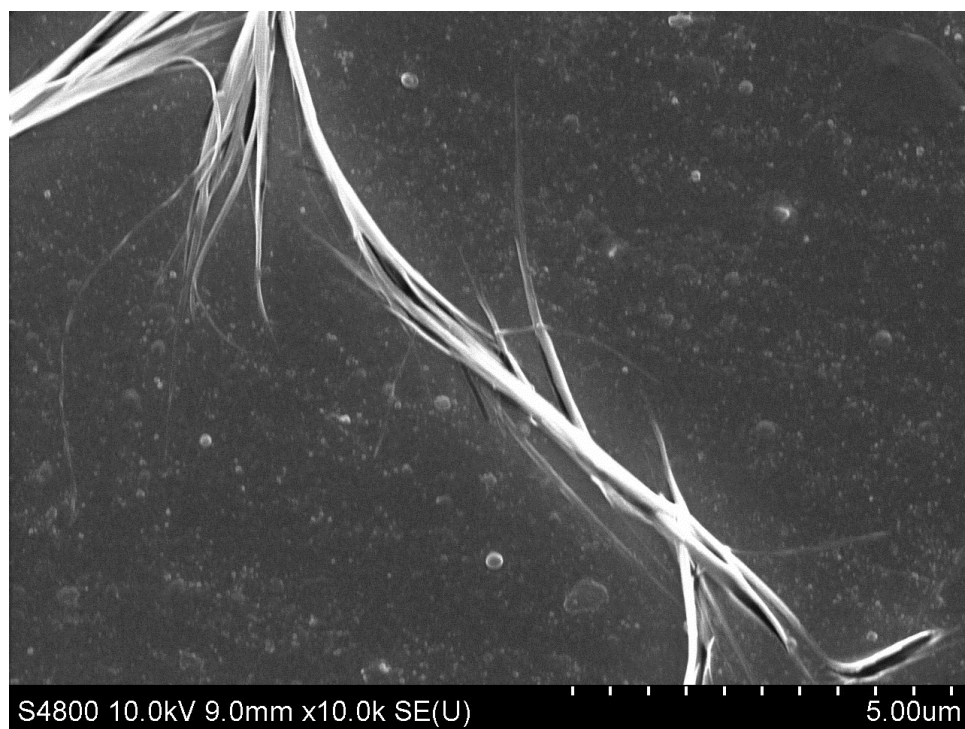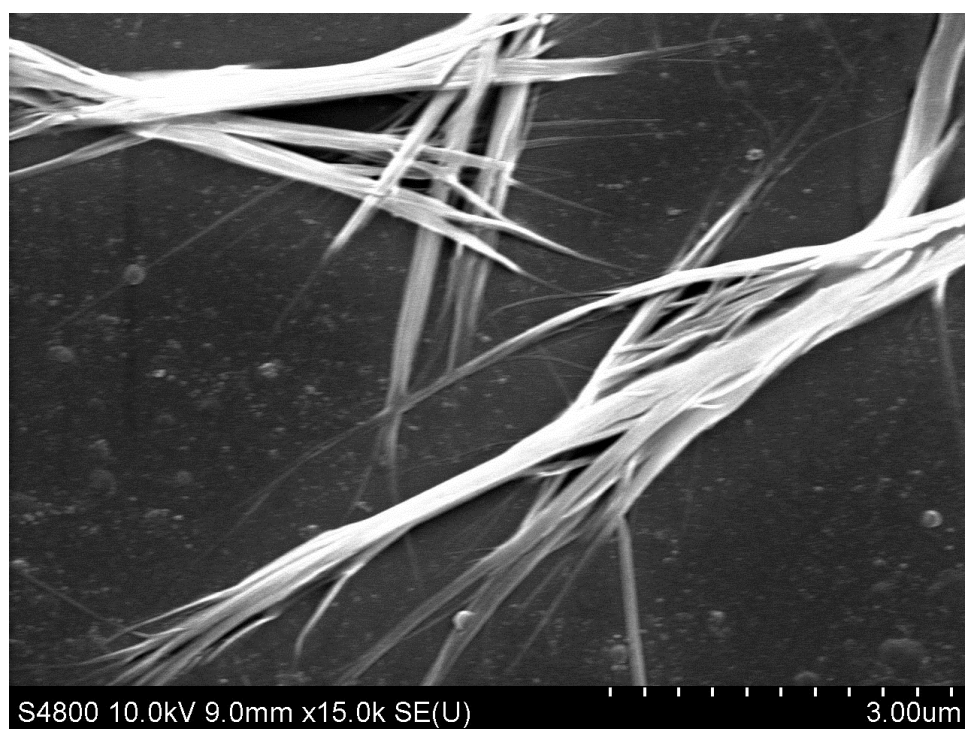

**(b) D-Glucose + MPBA**

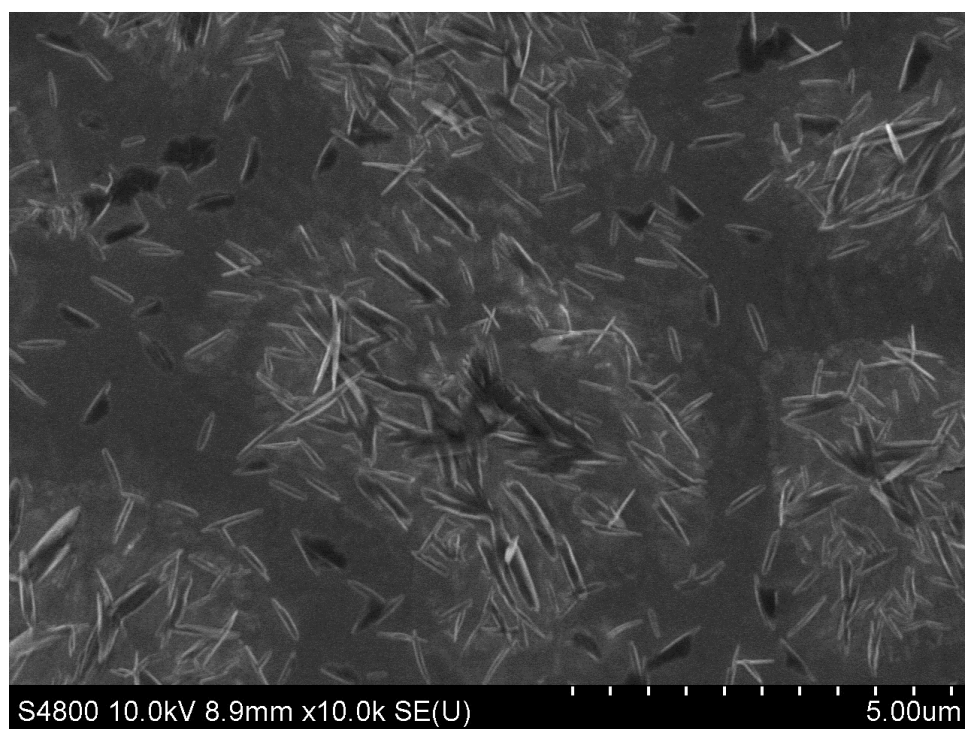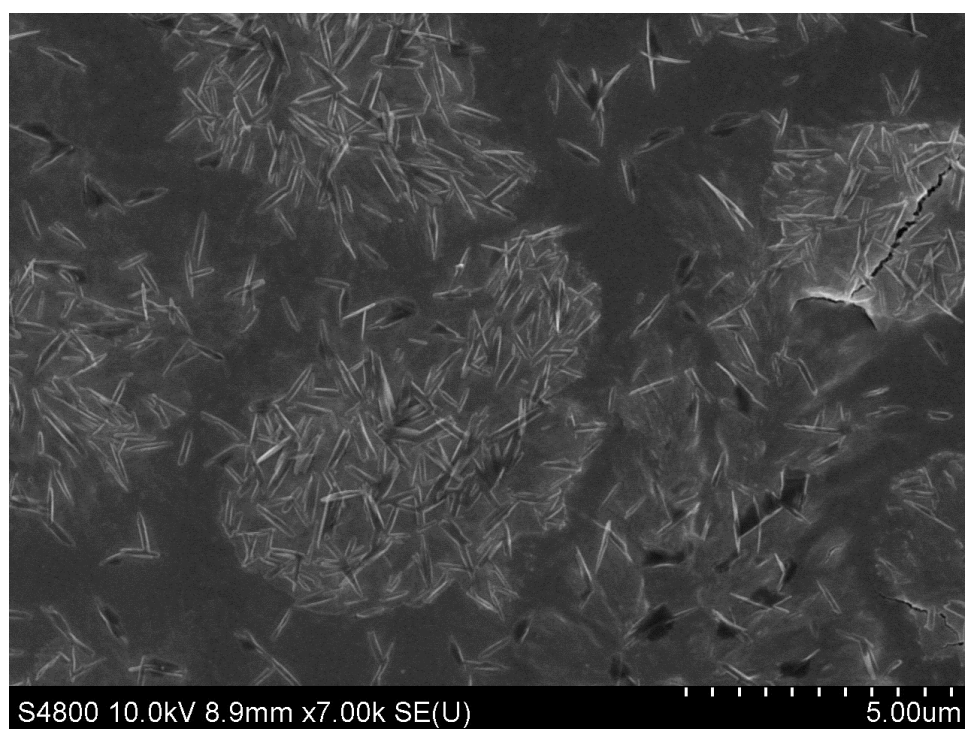

**(c) D-Glucose + Ag<sup>+</sup> + MPBA**

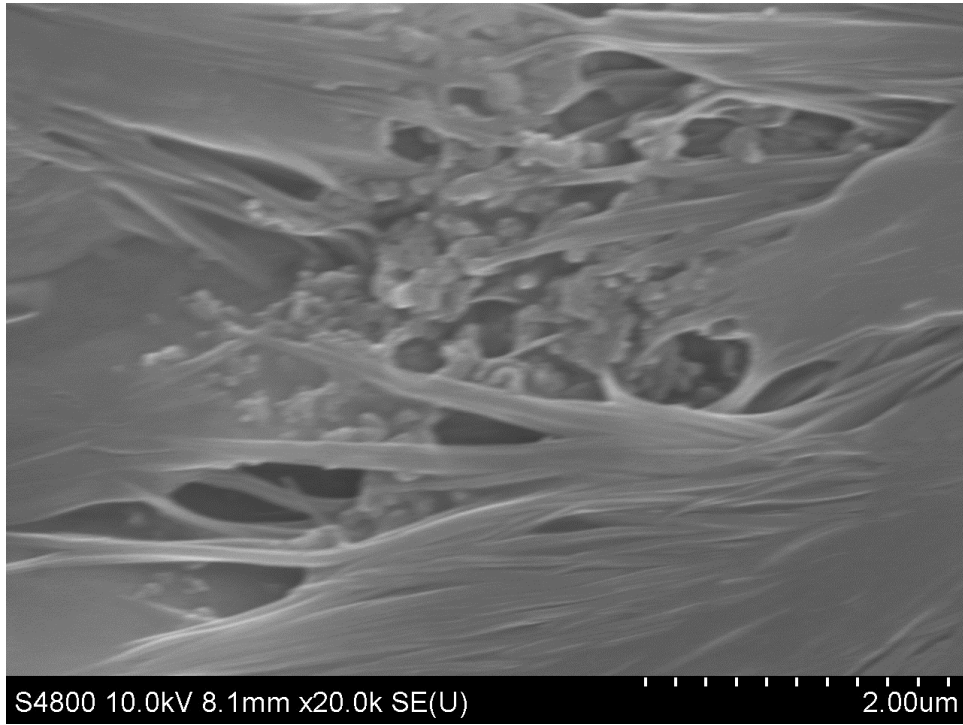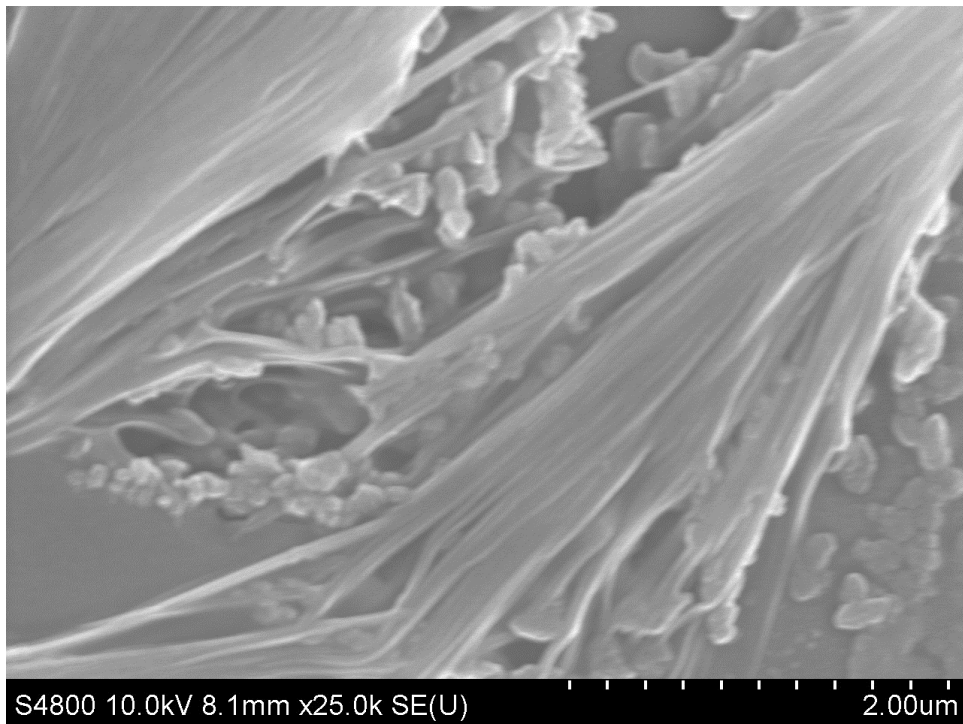

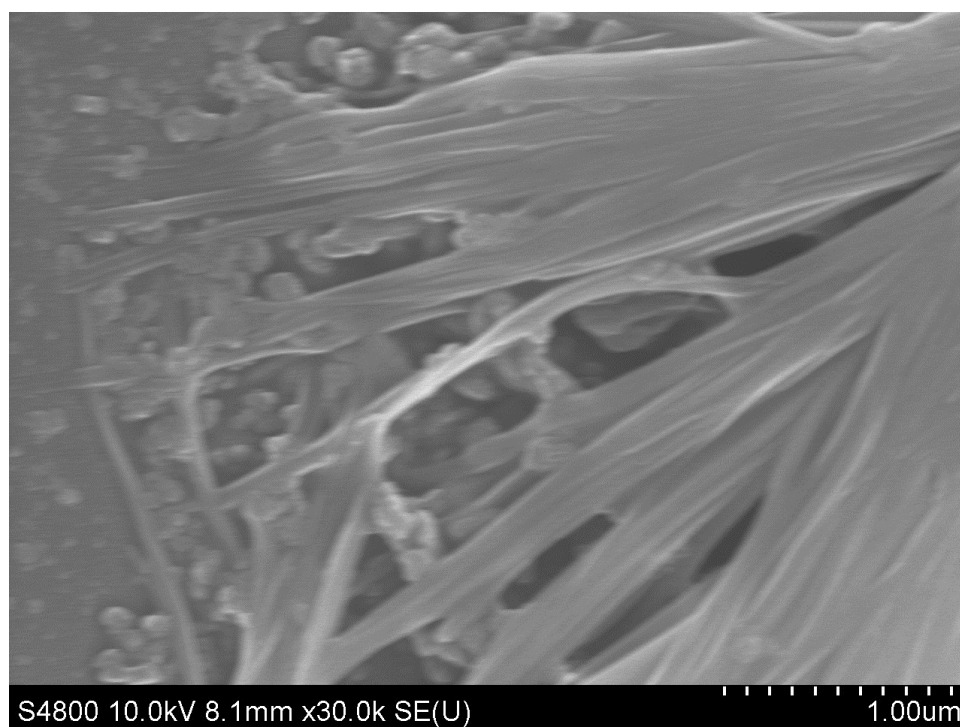

**Figure S3** SEM images of samples prepared from (a)  $1.0 \times 10^{-5}$  M MPBA and 1 equivalent of  $\text{Ag}^+$ , (b)  $1.0 \times 10^{-5}$  M MPBA and  $4.0 \times 10^{-4}$  M D-glucose, and (c)  $1.0 \times 10^{-5}$  M MPBA plus 1 equivalent of  $\text{Ag}^+$  and  $4.0 \times 10^{-4}$  M D-glucose.

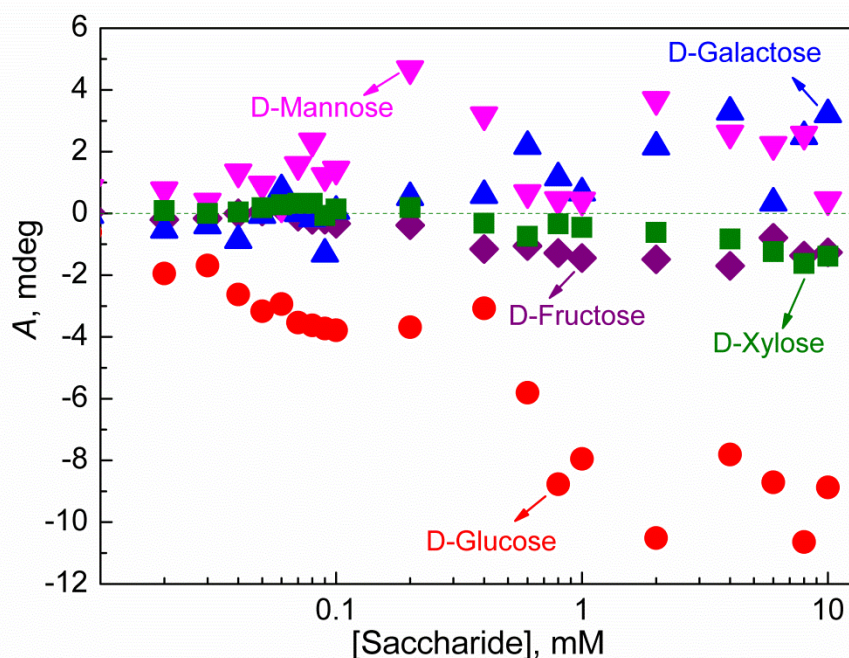

**Figure S4** Plots of  $A$ -value of saccharide- $\text{Ag}^+$ -MPBA supramolecular systems against saccharide concentration. The dependence is not only defined by the affinity of the individual saccharide towards boronic acid represented by phenylboronic acid (refer to J. P. Lorand, J. O. Edwards, *J. Org. Chem.*, 1959, **24**, 769-774), suggesting the contribution of the multivalent

interactions to the observed CD spectral profile. Note an extremely sensitive CD response toward glucose at micromolar level can be noted, which is much more sensitive than that for fructose which has a much higher affinity towards monoboronic acid such as phenylboronic acid. The “*boronic acid*” in this coordination polymer thus acts as a compound containing multiple boronic acid groups.  $A_{D\text{-glucose}} = \theta_{330\text{ nm}} - \theta_{280\text{ nm}}$ ,  $A_{D\text{-fructose}} = \theta_{350\text{ nm}} - \theta_{270\text{ nm}}$ ,  $A_{D\text{-mannose}} = \theta_{360\text{ nm}} - \theta_{300\text{ nm}}$ ,  $A_{D\text{-galactose}} = \theta_{340\text{ nm}} - \theta_{284\text{ nm}}$ ,  $A_{D\text{-xylose}} = \theta_{275\text{ nm}}$ .  $[\text{MPBA}] = [\text{Ag}^+] = 5.0 \times 10^{-5}\text{ M}$ .

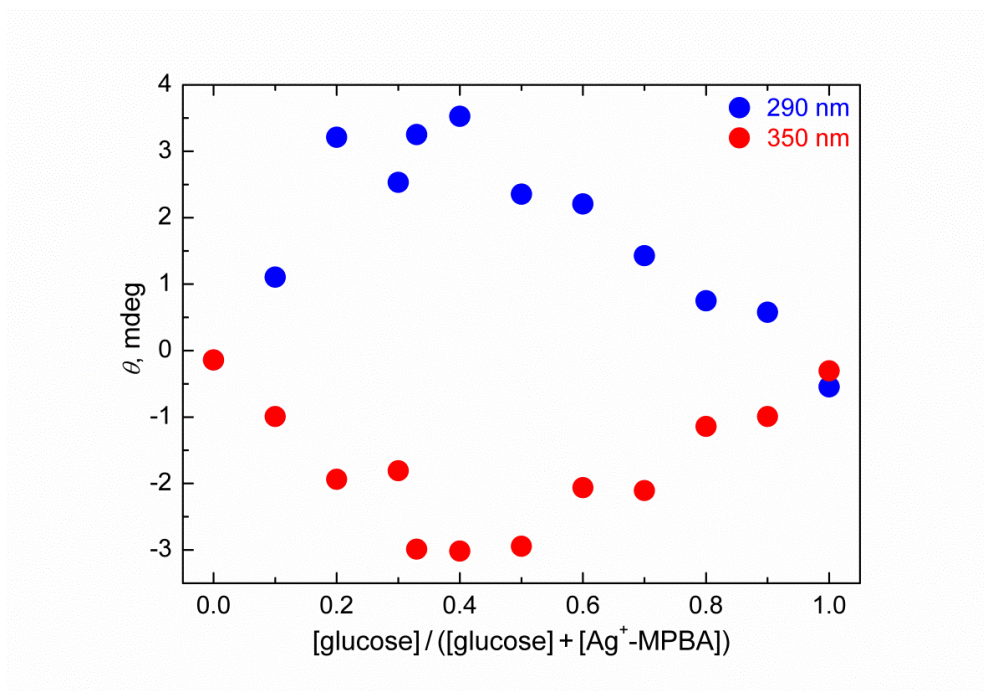

**Figure S5** Job plot for binding of D-glucose to  $\text{Ag}^+$ -MPBA coordination polymers. Total concentration of  $\text{Ag}^+$ -MPBA and D-glucose is  $1.0 \times 10^{-4}\text{ M}$ , while  $[\text{Ag}^+]$  is maintained the same as  $[\text{MPBA}]$ .

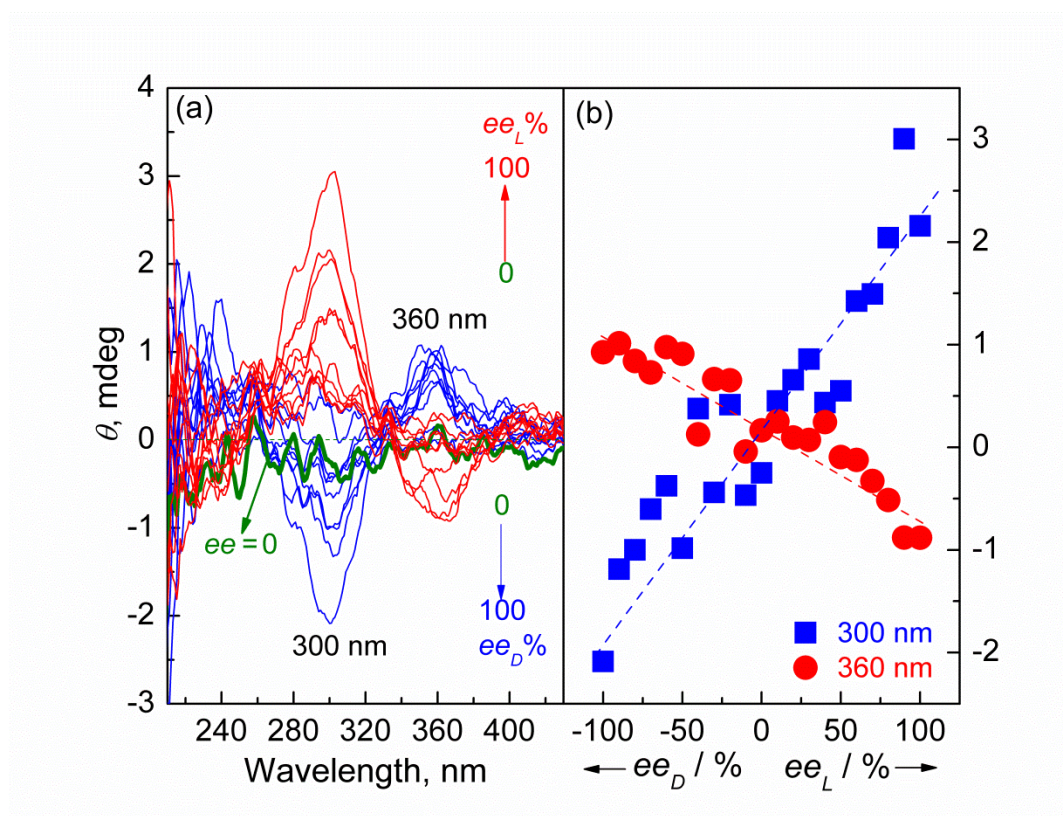

**Figure S6** (a) CD spectra of  $\text{Ag}^+$ -MPBA coordination polymers in the presence of mannose of varying  $ee$  and (b) plots of CD signals at 300 nm and 360 nm as a function of  $ee$  of mannose.  $[\text{Ag}^+\text{-MPBA}] = 5.0 \times 10^{-5}$  M,  $[\text{D-mannose}] + [\text{L-mannose}] = 2.0 \times 10^{-3}$  M.
